# Supplementary material for: Comprehensive Metabolomic, Lipidomic and Microscopic Profiling of Yarrowia lipolytica during Lipid Accumulation Identifies Targets for Increased Lipogenesis
Source: PubMed Central journal article supplement (PMC4408067; doi:10.1371/journal.pone.0123188), 2015-04-23
Supplement: pone.0123188.s001.pdf [file pone.0123188.s001.pdf]

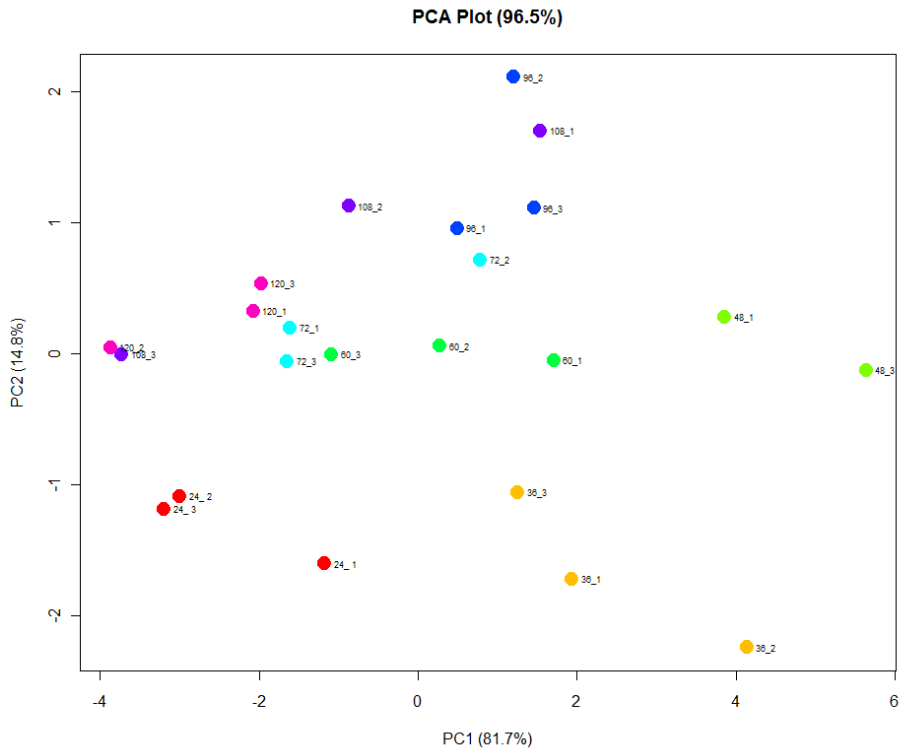

**Supplemental figure 1A. Principal component analysis of FAME datasets.** Biological replicates are color coded and plotted along principal components 1 and 2 to visualize clustering and reproducibility.

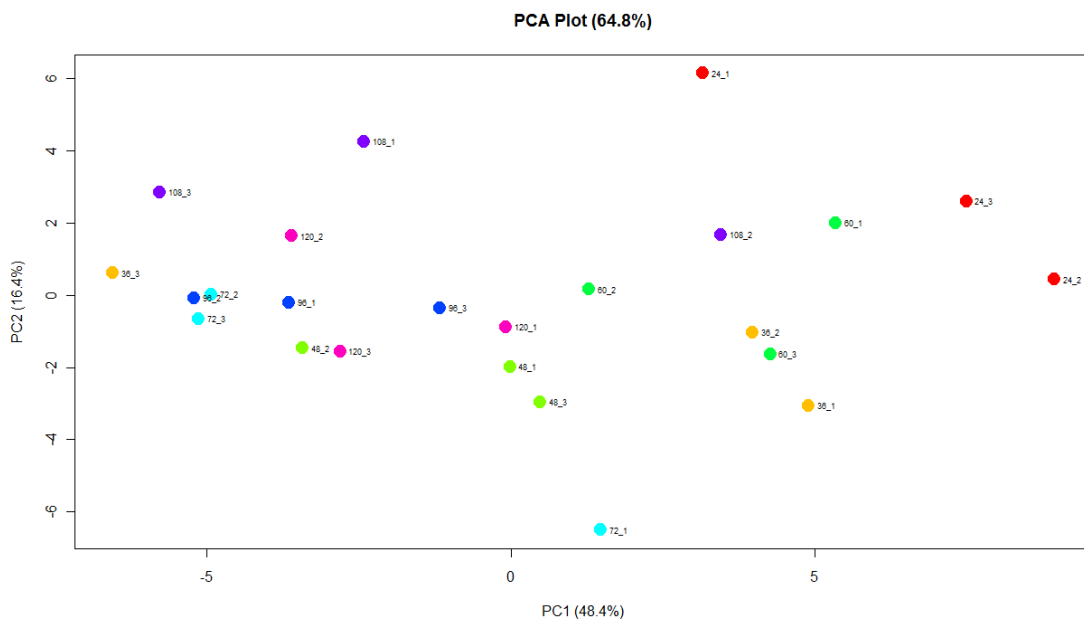

**Supplemental figure 1B. Principal component analysis of intact lipid datasets.** Biological replicates are color coded and plotted along principal components 1 and 2 to visualize clustering and reproducibility.

PCA Plot (72.4%)

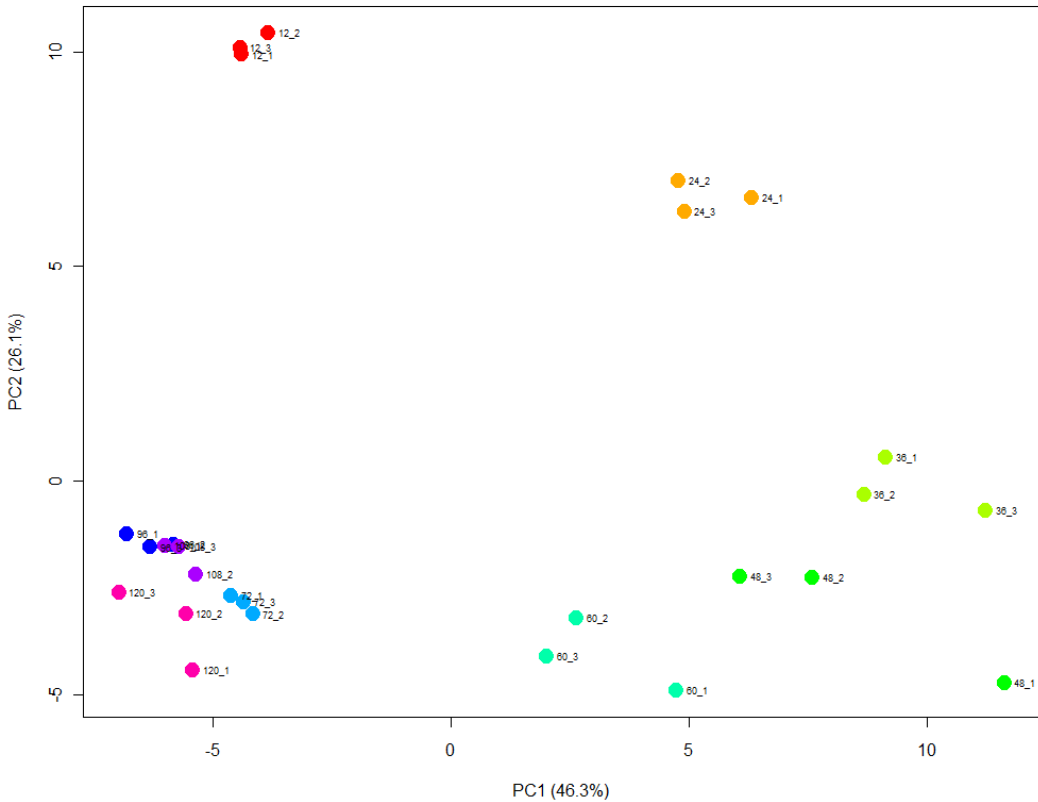

**Supplemental figure 1C. Principal component analysis of extracellular metabolite datasets.** Biological replicates are color coded and plotted along principal components 1 and 2 to visualize clustering and reproducibility.

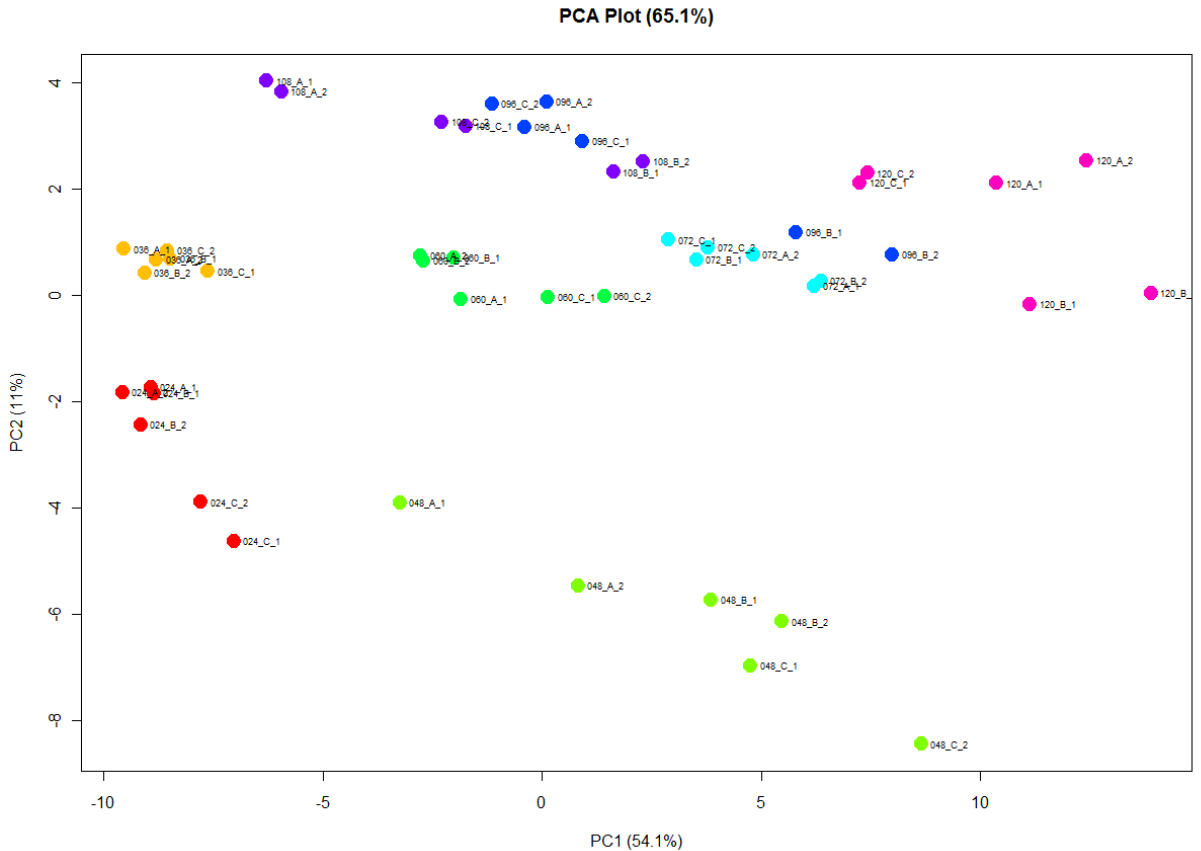

**Supplemental figure 1D. Principal component analysis of intracellular polar metabolite datasets.** Biological replicates are color coded and plotted along principal components 1 and 2 to visualize clustering and reproducibility.
