# Supplementary material for: Comprehensive Metabolomic, Lipidomic and Microscopic Profiling of Yarrowia lipolytica during Lipid Accumulation Identifies Targets for Increased Lipogenesis
Source: PubMed Central journal article supplement (PMC4408067; doi:10.1371/journal.pone.0123188), 2015-04-23
Supplement: pone.0123188.s002.pdf [file pone.0123188.s002.pdf]

**Table S1. AFS procedure for *Y. lipolytica* cell suspensions.**

| Step | Temp (°C) | Time (h) | Gradient (°C h <sup>-1</sup> ) |
|------|-----------|----------|--------------------------------|
| T1   | -90       | 48       |                                |
| S1   |           | 6        | 5                              |
| T2   | -60       | 20       |                                |
| S2   |           | 18       | 5                              |
| S2   |           | 12       | 5                              |
| T3   | 20        | 24       |                                |

Substitution medium at T1 and T2 was 1% glutaraldehyde and 0.1% tannic acid in anhydrous acetone. Three washes in 100% acetone, and 1% osmium tetroxide in 100% acetone followed as substitution media in T2-T3.
