# Supplementary material for: Comprehensive Metabolomic, Lipidomic and Microscopic Profiling of Yarrowia lipolytica during Lipid Accumulation Identifies Targets for Increased Lipogenesis
Source: PubMed Central journal article supplement (PMC4408067; doi:10.1371/journal.pone.0123188), 2015-04-23
Supplement: pone.0123188.s003.pdf [file pone.0123188.s003.pdf]

**Table S2. Volume of lipid droplets**

| Hour               | <b>12</b> | <b>24</b> | <b>36</b> | <b>48</b> | <b>60</b> | <b>72</b> | <b>96</b> | <b>108</b> | <b>120</b> |
|--------------------|-----------|-----------|-----------|-----------|-----------|-----------|-----------|------------|------------|
| Mean               | 0.66      | 3.77      | 6.51      | 6.46      | 10.34     | 8.46      | 4.92      | 5.49       | 5.36       |
| Median             | 0.09      | 2.93      | 5.86      | 4.68      | 9.37      | 7.11      | 1.80      | 2.43       | 3.01       |
| Standard deviation | 1.69      | 3.29      | 5.51      | 5.99      | 7.79      | 6.83      | 6.88      | 6.74       | 6.54       |

Measurements were obtained from z-stacks of cells stained for neutral lipids as in Figure 1. All volumes are in femtoliters.
